# Supplementary material for: TP53 mutations identify high-risk events for peripheral T-cell lymphoma treated with CHOP-based chemotherapy
Source: PubMed Central journal article supplement — Blood Adv. 2023 Apr 25;7(17):5172–86. doi: 10.1182/bloodadvances.2023009953 (PMC10480533; doi:10.1182/bloodadvances.2023009953), 2023-04-25
Supplement: BLOODA_ADV-2023-009953-mmc2.pdf [file BLOODA_ADV-2023-009953-mmc2.pdf]

## Supplemental Tables and Figures

### Supplemental Table 1a-k. Baseline clinical data and genetic aberrancies by histology

- Supplemental Table 1a.** Clinical data
- Supplemental Table 1b.** PTCL-NOS mutations
- Supplemental Table 1c.** PTCL-NOS CNA
- Supplemental Table 1d.** AITL mutations
- Supplemental Table 1e.** AITL CNA
- Supplemental Table 1f.** PTCL-TFH mutations
- Supplemental Table 1g.** PTCL-TFH CNA
- Supplemental Table 1h.** ALCL mutations
- Supplemental Table 1i.** ALCL CNA
- Supplemental Table 1j.** MEITL mutations
- Supplemental Table 1k.** MEITL CNA

[Data in spreadsheet]

PTCL, peripheral T-cell lymphomas; NOS, not otherwise specified; CNA, copy number alteration; AITL, angioimmunoblastic T-cell lymphoma; TFH, follicular T-helper cell phenotype; ALK, anaplastic lymphoma kinase; ALCL, anaplastic large cell lymphoma; MEITL, monomorphic epitheliotropic T-cell lymphoma; M, male; F, female; Y, yes; N, no; BMB, bone marrow biopsy; LDH, lactate dehydrogenase; ECOG, Eastern Cooperative Oncology Group Performance Status; ASCT, autologous stem-cell transplant; PFS, progression-free survival; MSK-IMPACT, Memorial Sloan Kettering Cancer Center Integrated Mutation Profiling of Actionable Cancer Targets; LN, lymph node; BM, bone marrow; Pos, position; Ref, reference; Var, variant; HGVSg, Human Genome Variation Society gene; AA, dominant allele; DEL, deletion; INS, insertion; SNP, single nucleotide polymorphism; DeepDel, deep deletion; AMP, amplification; Freq, frequency; OncoKB, Oncology Knowledge Base

### Supplemental Table 2. Responses and survival among the 3 cohorts

|                                                    | Entire cohort<br>(N=132) | CCD cohort<br>(n=87) | Prospective cohort<br>(n=72) | P                                                           |
|----------------------------------------------------|--------------------------|----------------------|------------------------------|-------------------------------------------------------------|
| Response at EOT, n (%)                             |                          |                      |                              | .59                                                         |
| Complete response                                  | 82 (62)                  | 58 (67)              | 53 (74)                      |                                                             |
| Partial response                                   | 9 (7)                    | 5 (6)                | 4 (6)                        |                                                             |
| Progressive disease                                | 41 (31)                  | 24 (28)              | 15 (21)                      |                                                             |
| Median follow-up among survivors in months (range) | 26 (2-118)               | 23 (2-118)           | 24 (6-118)                   | .92                                                         |
| 1-year PFS (%) (95% CI)                            | 45.0 (37.0-54.0)         | 49.0 (39.0-61.0)     | 59.0 (48.0-72.0)             | .06                                                         |
| 2-year PFS (%) (95% CI)                            | 28.0 (21.0-38.0)         | 34.0 (25.0-47.0)     | 43.0 (32.0-58.0)             | Entire vs CCD cohort (P=.27)                                |
| Median PFS, months (95% CI)                        | 9.4 (7.3-13.9)           | 10.8 (7.8-20.1)      | 19.1 (10.8-40.7)             | Entire vs prospective (P=.02)<br>CCD vs prospective (P=.19) |
| 1-year OS (%) (95% CI)                             | 88.0 (83.0-94.0)         | 89.0 (82.0-96.0)     | 88.0 (80.0-96.0)             |                                                             |
| 2-year OS (%) (95% CI)                             | 74.0 (66.0-82.0)         | 73.0 (63.0-84.0)     | 77.0 (66.0-88.0)             |                                                             |
| Median OS, months (95% CI)                         | 53.2 (42.5-70.7)         | 56.7 (44.6-NR)       | NR (45.9-NR)                 | .57                                                         |

EOT, end of curative-intent treatment; PFS, progression-free survival; OS, overall survival; NR, not reached

### Supplemental Table 3. Survival of entire cohort stratified by TP53 mutation and CDKN2A copy number status

| ENTIRE COHORT (N=132)                              | TP53-mutated<br>(n=21) | TP53-unmutated<br>(n=111) | P     | CDKN2A-deleted<br>(n=9) | CDKN2A-not deleted<br>(n=123) | P    |
|----------------------------------------------------|------------------------|---------------------------|-------|-------------------------|-------------------------------|------|
| Median follow-up among survivors in months (range) | 20.0 (3.0-89.0)        | 27.0 (6.0-118.0)          | .36   | 26.0 (3.0-118.0)        | 26.0 (6.0-38.0)               | .56  |
| 1-year PFS (%) (95% CI)                            | 29.0 (15.0-56.0)       | 48.0 (39.0-58.0)          |       | 11.0 (2.0-71.0)         | 47.0 (39.0-57.0)              |      |
| 2-year PFS (%) (95% CI)                            | 10.0 (3.0-36.0)        | 32.0 (24.0-43.0)          |       | 11.0 (2.0-71.0)         | 30.0 (22.0-40.0)              |      |
| Median PFS, months (95% CI)                        | 4.5 (3.8-13.9)         | 10.5 (7.8-18.1)           | <.001 | 5.0 (2.6-NR)            | 9.8 (7.5-16.4)                | .06  |
| <b>Cox regression</b>                              |                        |                           |       |                         |                               |      |
| HR (95% CI)                                        | 2.3 (1.4-3.8)          | 1                         | .001  | 2.0 (1.0-4.1)           | 1                             | .06  |
| 1-year OS (%) (95% CI)                             | 84.0 (70.0-100.0)      | 89.0 (83.0-95.0)          |       | 76.0 (52.0-100.0)       | 89.0 (84.0-95.0)              |      |
| 2-year OS (%) (95% CI)                             | 77.0 (60.0-100.0)      | 73.0 (64.0-83.0)          |       | 38.0 (16.0-92.0)        | 76.0 (68.0-85.0)              |      |
| Median OS, months (95% CI)                         | 48.2 (29.2-NR)         | 53.2 (42.3-71.0)          | .98   | 17.6 (12.8-NR)          | 56.7 (44.6-101.0)             | .004 |
| <b>Cox regression</b>                              |                        |                           |       |                         |                               |      |
| HR (95% CI)                                        | 1.0 (0.5-2.1)          | 1                         | 0.98  | 3.3 (1.4-8.0)           | 1                             | .007 |

PFS, progression-free survival; OS, overall survival; NR, not reached

**Supplemental Table 4.** Survival of prospective cohort stratified by *TP53* mutation and *CDKN2A* copy number status

| <b>Prospective cohort (n=72)</b>                   | <i>TP53</i> -mutated (n=7) | <i>TP53</i> -unmutated (n=65) | <i>P</i>   | <i>CDKN2A</i> -deleted (n=4) | <i>CDKN2A</i> -not deleted (n=68) | <i>P</i> |
|----------------------------------------------------|----------------------------|-------------------------------|------------|------------------------------|-----------------------------------|----------|
| Median follow-up among survivors in months (range) | 31.0 (12.0-67.0)           | 24.0 (6.0-118.0)              | .50        | 22.0 (6.0-38.0)              | 24.0 (6.0-118.0)                  | .>.99    |
| 1-year PFS (%) (95% CI)                            | 43.0 (18.0-100.0)          | 61.0 (49.0-74.0)              |            | 25.0 (5.0-100.0)             | 61.0 (50.0-74.0)                  |          |
| 2-year PFS (%) (95% CI)                            | 0.0                        | 47.0 (35.0-6.03)              |            | 25.0 (5.0-100.0)             | 44.0 (32.0-60.0)                  |          |
| Median PFS, months (95% CI)                        | 4.1 (2.8-NR)               | 19.7 (10.8-72.3)              | <b>.02</b> | 2.2 (1.3-NR)                 | 19.1 (12.2-40.7)                  | .09      |
| <b>Cox regression</b>                              |                            |                               |            |                              |                                   |          |
| HR (95% CI)                                        | 2.8 (1.2-6.7)              | 1.0                           | <b>.02</b> | 2.7 (0.8-8.9)                | 1                                 | .10      |
| 1-year OS (%) (95% CI)                             | 86.0 (63.0-100.0)          | 88.0 (80-97)                  |            | 75.0 (43.0-100.0)            | 88.0 (81.0-97.0)                  |          |
| 2-year OS (%) (95% CI)                             | 86.0 (63.0-100.0)          | 76 (65-88)                    |            | 38.0 (8.0-100.0)             | 79.0 (68.0-90.0)                  |          |
| Median OS, months (95% CI)                         | NR (NA-NA)                 | 58.7 (45.9-NR)                | .37        | 12.8 (5.3-NR)                | NR (56.7-NR)                      | .07      |
| <b>Cox regression</b>                              |                            |                               |            |                              |                                   |          |
| HR (95% CI)                                        | 0.4 (0.1-3.1)              | 1.0                           | .39        | 3.6 (0.8-15.9)               | 1.0                               | .09      |

*PFS*, progression-free survival; *OS*, overall survival; *NR*, not reached; *NA*, not applicable

**Supplemental Table 5.** Survival of patients with non-AITL-PTCL in entire cohort stratified by *TP53* mutation and *CDKN2A* copy number status

| <b>Entire cohort excluding AITL (n=70)</b>         | <i>TP53</i> -mutated (n=19) | <i>TP53</i> -unmutated (n=51) | <i>P</i>   | <i>CDKN2A</i> -deleted (n=8) | <i>CDKN2A</i> not deleted (n=62) | <i>P</i>    |
|----------------------------------------------------|-----------------------------|-------------------------------|------------|------------------------------|----------------------------------|-------------|
| Median follow-up among survivors in months (range) | 14.5 (2.5-88.5)             | 29.8 (5.6-112.0)              | .34        | 22.2 (6.3-38.1)              | 26.6 (2.5-112.0)                 | .97         |
| 1-year PFS (%) (95% CI)                            | 32.0 (16.0-61.0)            | 42.0 (30.0-59.0)              |            | 13.0 (2.0-78.0)              | 43.0 (32.0-58.0)                 |             |
| 2-year PFS (%) (95% CI)                            | 11.0 (3.0-39.0)             | 32.0 (21.0-49.0)              |            | 13.0 (2.0-78.0)              | 27.0 (17.0-42.0)                 |             |
| Median PFS, months (95% CI)                        | 4.5 (4.1-17.4)              | 7.8 (7.1-20.1)                | <b>.02</b> | 3.8 (2.6-NR)                 | 7.5 (6.8-18.1)                   | .11         |
| <b>Cox regression</b>                              |                             |                               |            |                              |                                  |             |
| HR (95% CI)                                        | 2.0 (1.1-3.6)               | 1.0                           | <b>.02</b> | 1.9 (0.8-4.2)                | 1.0                              | .12         |
| 1-year OS (%) (95% CI)                             | 83.0 (66.0-100.0)           | 87.0 (78.0-97.0)              |            | 73.0 (47.0-100.0)            | 88.0 (79.0-97.0)                 |             |
| 2-year OS (%) (95% CI)                             | 74.0 (55.0-100.0)           | 68.0 (55.0-84.0)              |            | 29.0 (9.0-93.0)              | 75.0 (64.0-88.0)                 |             |
| Median OS, months (95% CI)                         | 44.6 (24.7-NR)              | 44.2 (31.6-NR)                | .86        | 17.4 (11.1-NR)               | 48.2 (42.5-NR)                   | <b>.004</b> |
| <b>Cox regression</b>                              |                             |                               |            |                              |                                  |             |
| HR (95% CI)                                        | 1.1 (0.5-2.4)               | 1.0                           | .86        | 3.6 (1.4-9.2)                | 1.0                              | <b>.007</b> |

*PFS*, progression-free survival; *OS*, overall survival; *NR*, not reached

# Supplemental Figure 1

**A.**

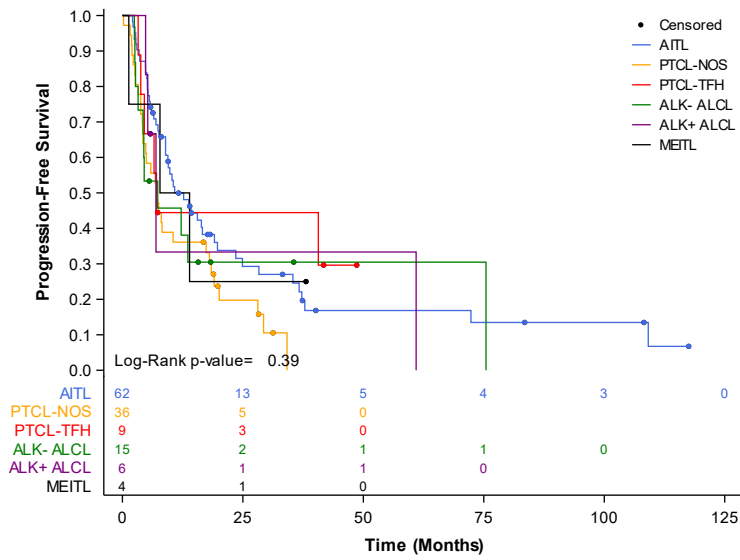

**B.**

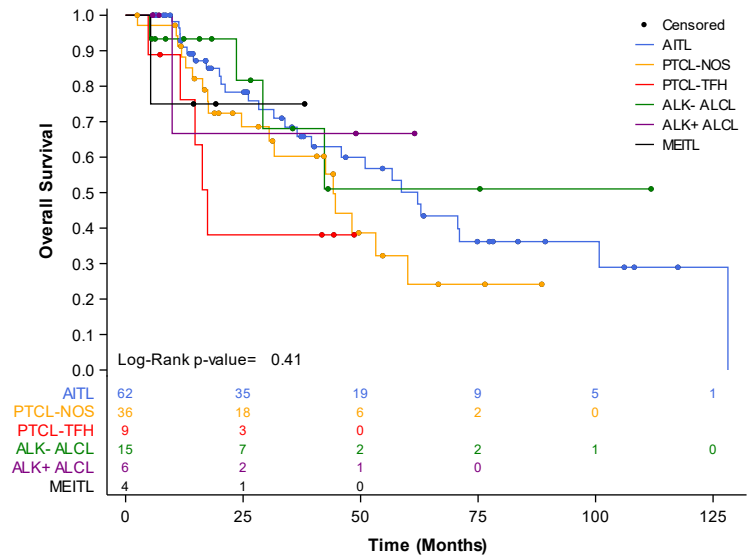

**C.**

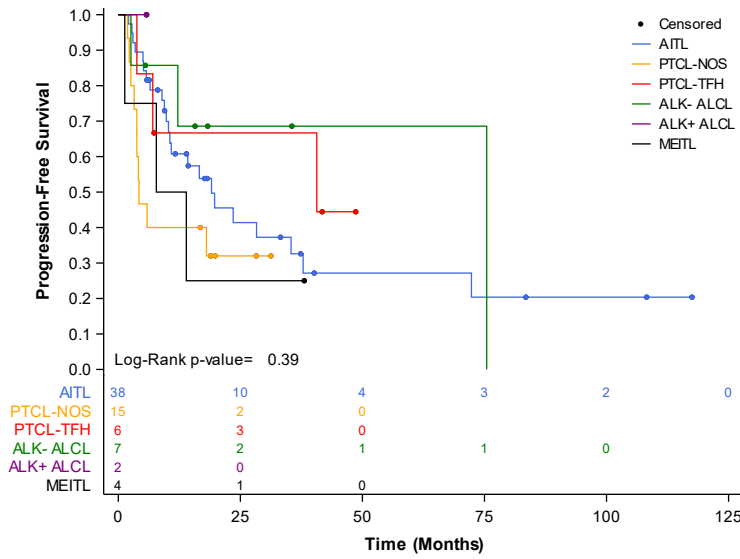

**D.**

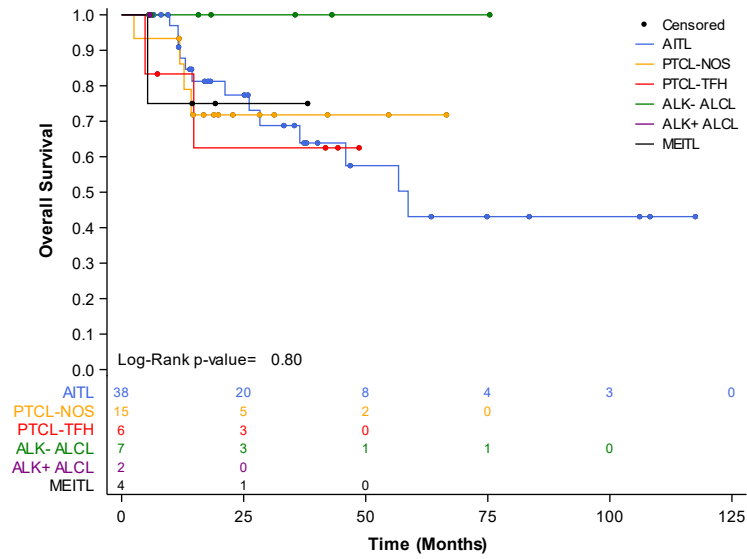

**Kaplan-Meier survival curves by histology. (A)** Progression-free survival (PFS) and **(B)** overall survival (OS) of entire cohort. **(C)** PFS and **(D)** OS of the prospective cohort. Living patients were censored at time of last follow-up (filled circles). The number of patients at risk at each time point is noted.

Supplemental Figure 2

A.

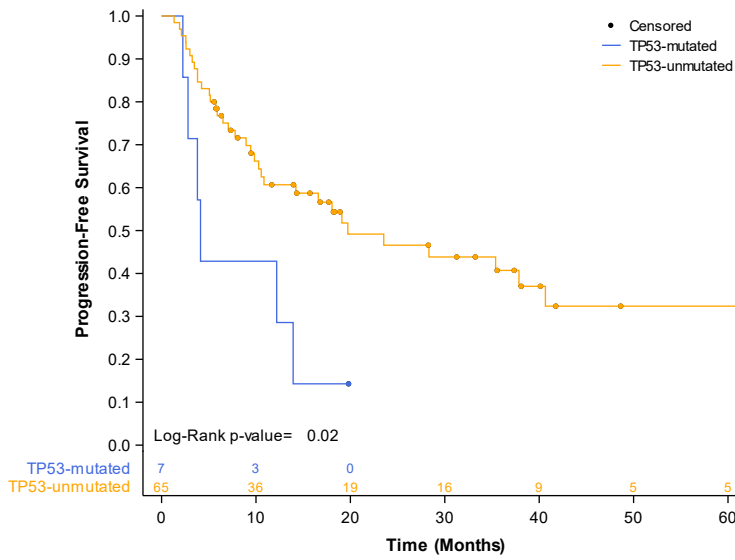

B.

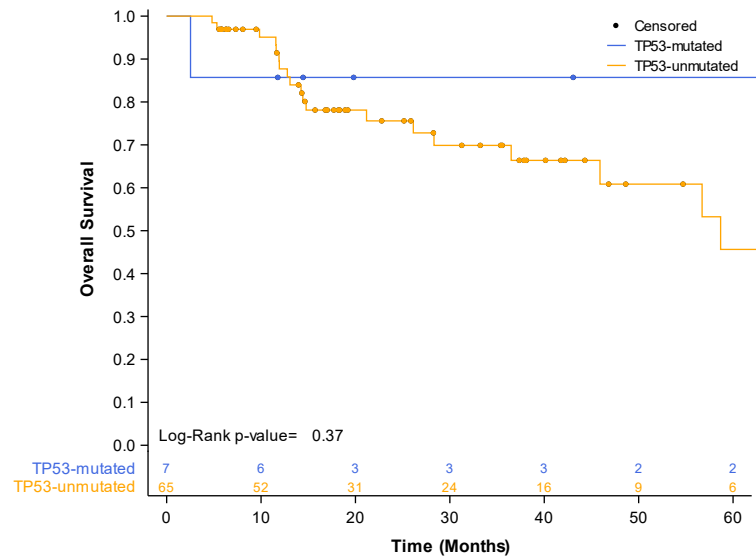

**Kaplan-Meier survival curves of the prospective cohort (n=72) stratified by *TP53* mutation status. (A) Progression-free survival and (B) overall survival. Living patients were censored at the time of last follow-up (filled circles). The number of patients at risk at each time point is noted.**

**Supplemental Figure 3:**

**A.**

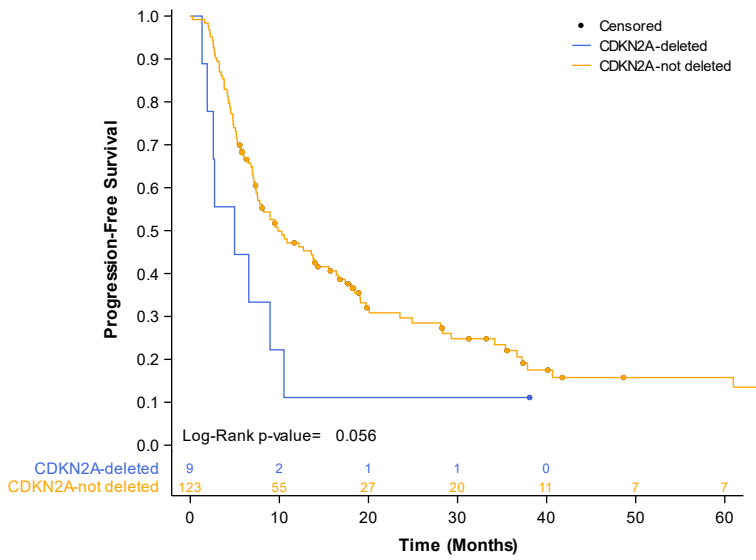

**B.**

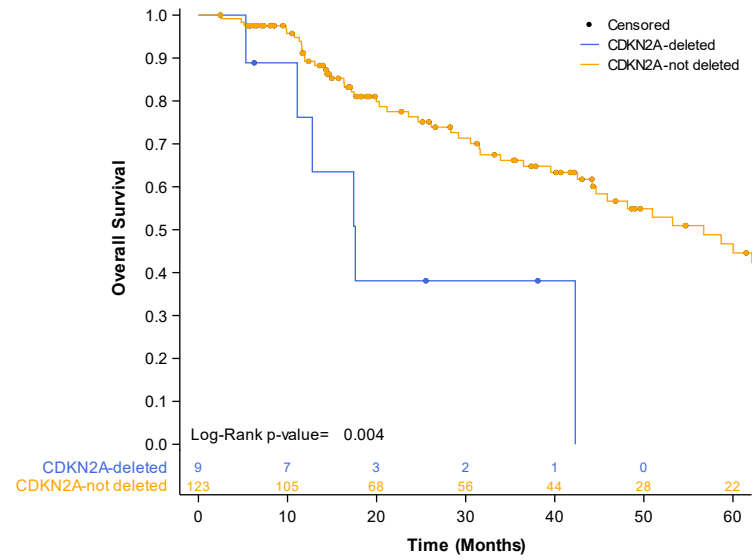

**Kaplan-Meier survival curves for entire cohort (N=132) stratified by *CDKN2A* copy number status.**

**(A)** Progression-free survival and **(B)** overall survival. Living patients were censored at time of last follow-up (filled circles). The number of patients at risk at each time point is noted.

### Supplemental Figure 4

**A.**

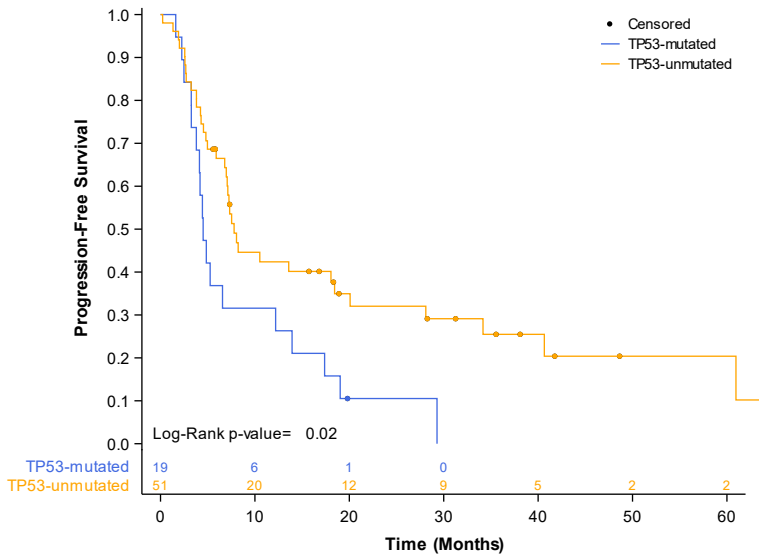

**B.**

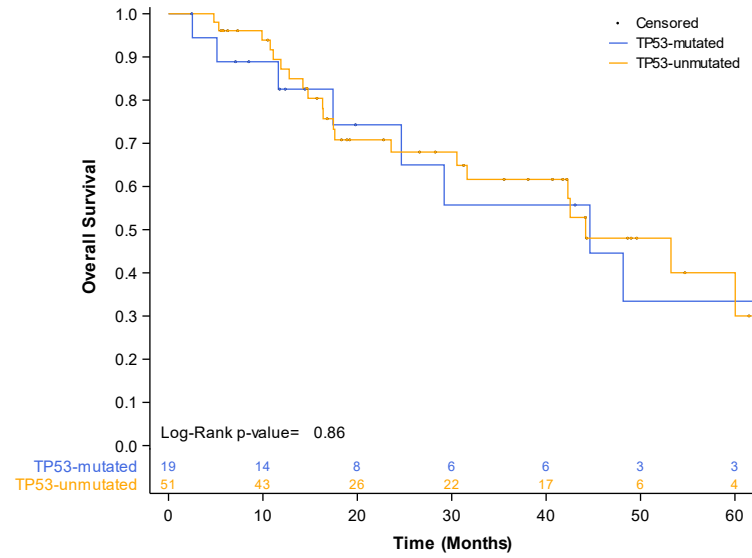

**Kaplan-Meier survival curves for patients with non-angioimmunoblastic T-cell lymphoma (AITL)-peripheral T-cell lymphoma (PTCL; n=70) stratified by *TP53* mutation status. (A) Progression-free survival and (B) overall survival. Living patients were censored at time of last follow-up (filled circles). The number of patients at risk at each time point is noted.**

Supplemental Figure 5

A.

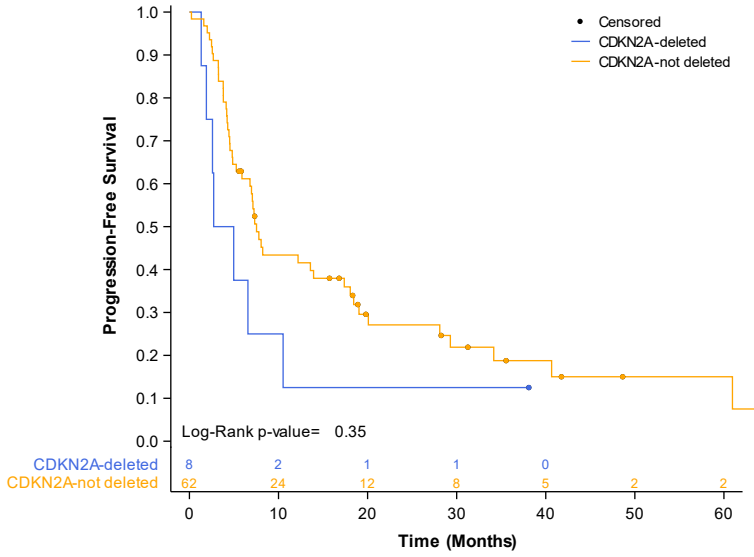

B.

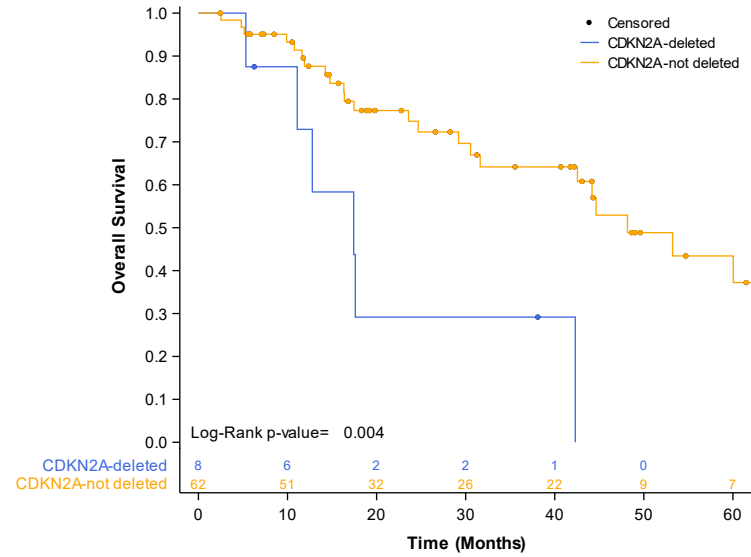

**Kaplan-Meier survival curves for patients with non-AITL-PTCL (n=70) stratified by *CDKN2A* copy number status. (A) Progression-free survival and (B) overall survival. Living patients were censored at time of last follow-up (filled circles). The number of patients at risk at each time point is noted.**

## Supplemental Figure 6

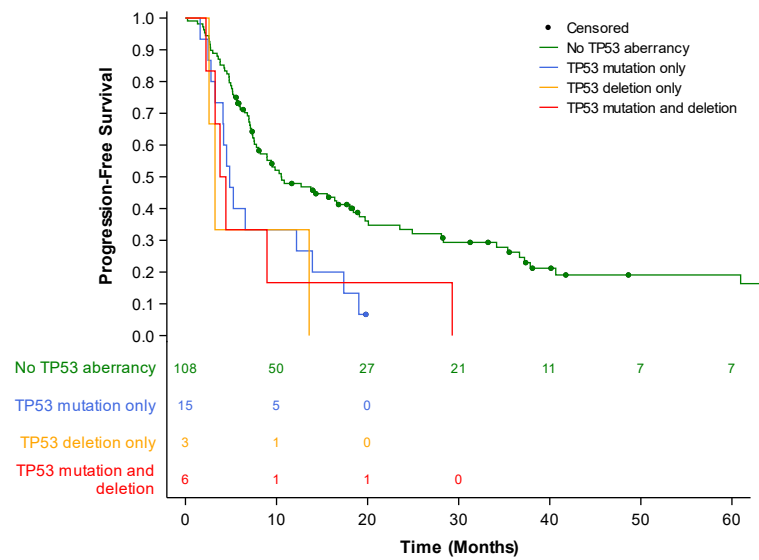

**Kaplan-Meier survival curve of progression-free survival for entire cohort (N=132) stratified by *TP53* mutation and copy number status.** Living patients were censored at time of last follow-up (filled circles). The number of patients at risk at each time point is noted.
